# Supplementary material
Source: PubMed Central journal article supplement (PMC3809511)
Supplement: mmc1.pdf [file mmc1.pdf]

# THE LANCET

## **Supplementary appendix**

This appendix formed part of the original submission and has been peer reviewed. We post it as supplied by the authors.

Supplement to: Shah ASV, Langrish JP, Nair H, et al. Global association of air pollution and heart failure: a systematic review and meta-analysis. *Lancet* 2013; published online July 10. [http://dx.doi.org/10.1016/S0140-6736\(13\)60898-3](http://dx.doi.org/10.1016/S0140-6736(13)60898-3).

# Global Association of Air Pollution and Heart Failure

## *A Systematic Review and Meta-analysis*

Anoop S V Shah,<sup>1</sup> Jeremy P Langrish,<sup>1</sup> Harish Nair,<sup>2,3</sup> David A McAllister,<sup>2</sup>  
Amanda L Hunter,<sup>1</sup> Ken Donaldson,<sup>1</sup> David E Newby,<sup>1</sup> Nicholas L Mills<sup>1</sup>

<sup>1</sup> BHF Centre for Cardiovascular Science, University of Edinburgh, United Kingdom

<sup>2</sup> Centre of Population Health Sciences, University of Edinburgh, United Kingdom

<sup>3</sup> Public Health Foundation of India, New Delhi, India

### **Correspondence and requests for reprints:**

Dr Nicholas L Mills  
BHF/University Centre for Cardiovascular Science  
The University of Edinburgh  
Chancellor's Building  
Edinburgh  
EH16 4SB  
United Kingdom  
Tel: +44 131 242 6517  
Fax: +44 131 242 6379  
E-mail: [nick.mills@ed.ac.uk](mailto:nick.mills@ed.ac.uk)

**Support:** British Heart Foundation Clinical Research Scholarship  
(SS/CH/09/002), Intermediate Fellowship (FS/10/024/28266),  
Chair Award (CH/09/002) and Programme Grant  
(RG/10/9/28286)

# Supplementary Appendices

**Appendix A – Search criteria**

**Appendix B – Number of studies identified, included and excluded from analysis**

**Appendix C – Summary of characteristics pertaining to study quality**

**Appendix D – US state abbreviations**

**Appendix E – Summary of impact analysis per state**

## **Appendix A**

### **Search Criteria**

#### **I. MedLine and EMBASE**

- 1 Exploded - air pollution.mp. or Air Pollution/
- 2 Exploded - particulate matter.mp. or Particulate Matter/
- 3 Exploded - nitrogen dioxide.mp. or Nitrogen Dioxide/
- 4 Exploded - carbon monoxide.mp. or Carbon Monoxide/
- 5 Exploded - sulphur dioxide.mp. or Sulphur Dioxide/
- 6 Exploded - ozone.mp. or Ozone/
- 7 1 or 2 or 3 or 4 or 5 or 6
- 8 Exploded - heart failure.mp. or Heart failure/
- 9 Exploded - congestive cardiac failure.mp.
- 10 Exploded - heart failure, systolic/ or ventricular dysfunction, left/ or systolic dysfunction.mp.
- 11 Exploded - diastolic dysfunction.mp.
- 12 Exploded - left ventricular impairment.mp.
- 13 8 or 9 or 10 or 11 or 12
- 14 7 and 13

#### **II. Web Of Science, CINAHL AND Global Health**

“Cardiac failure” OR “Heart failure” OR “Congestive cardiac failure” OR “Left ventricular failure” OR “Systolic heart failure” OR “Diastolic heart failure”

AND

“Air pollution” OR “Particulate matter” OR “PM<sub>10</sub>” OR “PM<sub>2.5</sub>” OR “ozone” OR “nitrogen dioxide” OR “sulphur dioxide” OR “carbon monoxide”

## Appendix B

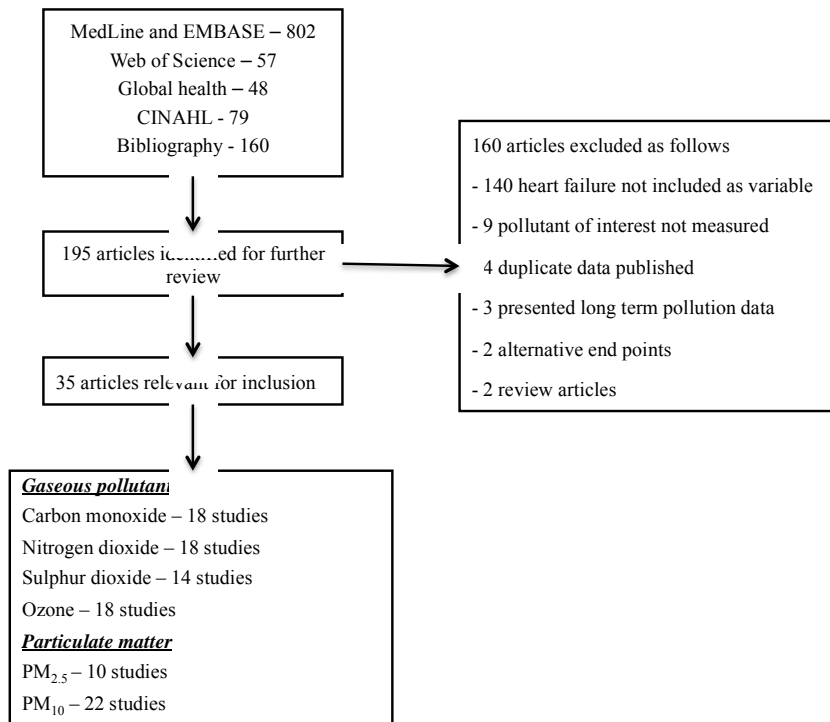

## Appendix C

| Author                          | Year | Generalizability | Mean daily pollutant level | > 10,000 events | Total population † | Time-stratified case crossover** | Multiple lags** | Control for repeated events** | Complete evaluation of study area** | Non-linear adjustment for temperature** | Adjusted for temperature | Adjusted for time trends | Adjusted for seasonality | Adjusted for influenza epidemics |
|---------------------------------|------|------------------|----------------------------|-----------------|--------------------|----------------------------------|-----------------|-------------------------------|-------------------------------------|-----------------------------------------|--------------------------|--------------------------|--------------------------|----------------------------------|
| Schwartz et al <sup>1</sup>     | 1995 | 1                | 1                          | 1               | 0                  | n/a                              | 1               | 0                             | 1                                   | 1                                       | 1                        | 1                        | 1                        | 0                                |
| Morris et al <sup>2</sup>       | 1995 | 1                | 1                          | 1               | 0                  | n/a                              | 1               | 0                             | 1                                   | 0                                       | 1                        | 1                        | 1                        | 0                                |
| Burnett et al <sup>3</sup>      | 1997 | 1                | 1                          | 1               | 0                  | n/a                              | 1               | 0                             | 0                                   | 1                                       | 1                        | 1                        | 1                        | 0                                |
| Poloniecki et al <sup>4</sup>   | 1997 | 1                | 1                          | 1               | 1                  | n/a                              | 0               | 0                             | 0                                   | 0                                       | 1                        | 1                        | 1                        | <b>1</b>                         |
| Morris et al <sup>5</sup>       | 1998 | 1                | 1                          | 1               | 0                  | n/a                              | 1               | 0                             | 1                                   | 1                                       | 1                        | 1                        | 1                        | 0                                |
| Wong CM et al <sup>6</sup>      | 1999 | 1                | 1                          | 0               | 0                  | n/a                              | 1               | 0                             | 0                                   | 0                                       | 1                        | 1                        | 1                        | <b>1</b>                         |
| Wong TW et al <sup>7</sup>      | 1999 | 1                | 1                          | 0               | 0                  | n/a                              | 1               | 0                             | 1                                   | 1                                       | 1                        | 1                        | 1                        | 0                                |
| Burnett et al <sup>8</sup>      | 1999 | 1                | 0§§                        | 1               | 1                  | n/a                              | 1               | 0                             | 1                                   | 1                                       | 1                        | 1                        | 1                        | 0                                |
| Stieb et al <sup>9</sup>        | 2000 | 1                | 1                          | 0               | 1                  | n/a                              | 1               | 0                             | 1                                   | 1                                       | 1                        | 1                        | 0                        | 0                                |
| Goldberg et al <sup>10-12</sup> | 2000 | 1                | 0§§                        | 1               | 0                  | n/a                              | 1               | n/a                           | 1                                   | 1                                       | 1                        | 0                        | 1                        | 0                                |
| Linn et al <sup>13</sup>        | 2000 | 1                | 1                          | 1               | 1                  | n/a                              | 1               | 0                             | 0                                   | 1                                       | 1                        | 1                        | 1                        | 0                                |
| Lippmann et al <sup>12,14</sup> | 2000 | 1                | 1                          | 1               | 0                  | n/a                              | 1               | n/a                           | 1                                   | 1                                       | 1                        | 1                        | 1                        | <b>1</b>                         |
| Ye et al <sup>15</sup>          | 2001 | 1                | 1                          | 0               | 0                  | n/a                              | 1               | 0                             | 0                                   | 0                                       | 1                        | 0                        | 0                        | 0                                |
| Kwon et al <sup>16</sup>        | 2001 | 1                | 1                          | 0               | 1                  | n/a                              | 0               | n/a                           | 1                                   | 1                                       | 1                        | 1                        | 1                        | 0                                |
| Hoek et al <sup>12,17</sup>     | 2001 | 1                | 1                          | 1               | 1                  | n/a                              | 1               | n/a                           | 1                                   | 1                                       | 1                        | 1                        | 1                        | 0                                |
| McGowan et al <sup>18</sup>     | 2002 | 1                | 1                          | 0               | 1                  | n/a                              | 1               | 0                             | 1                                   | 0                                       | 1                        | 0                        | 1                        | 0                                |
| Koken et al <sup>19</sup>       | 2003 | 1                | 1                          | 0               | 0                  | n/a                              | 1               | 0                             | 1                                   | 1                                       | 1                        | 0                        | 0                        | 0                                |

|                                |      |    |   |   |   |     |   |     |   |   |   |   |   |          |
|--------------------------------|------|----|---|---|---|-----|---|-----|---|---|---|---|---|----------|
| Bateson et al <sup>20</sup>    | 2004 | 1  | 1 | 1 | 0 | 1   | 0 | n/a | 1 | 1 | 1 | 1 | 1 | 0        |
| Metzger et al <sup>21</sup>    | 2004 | 1  | 1 | 1 | 1 | n/a | 1 | 1   | 1 | 1 | 1 | 1 | 1 | 0        |
| Wellenius et al <sup>22</sup>  | 2005 | 1  | 1 | 1 | 0 | 1   | 1 | 1   | 1 | 0 | 1 | 1 | 1 | 0        |
| Wellenius et al <sup>23</sup>  | 2006 | 1  | 1 | 1 | 0 | 1   | 1 | 0   | 1 | 1 | 1 | 1 | 1 | 0        |
| Martins et al <sup>24</sup>    | 2006 | 1  | 1 | 1 | 1 | n/a | 1 | 0   | 1 | 1 | 1 | 1 | 1 | 0        |
| Dominici et al <sup>25</sup>   | 2006 | 1  | 1 | 1 | 0 | n/a | 1 | 0   | 1 | 1 | 1 | 1 | 1 | <b>1</b> |
| Barnett et al <sup>26</sup>    | 2006 | 1  | 1 | 1 | 1 | 1   | 1 | 0   | 1 | 1 | 1 | 1 | 1 | 0        |
| Lee et al <sup>27</sup>        | 2007 | 1  | 1 | 1 | 1 | 0   | 1 | 0   | 1 | 0 | 0 | 1 | 1 | 0        |
| Peel et al <sup>28</sup>       | 2007 | 1  | 1 | 1 | 1 | 1   | 1 | 1   | 1 | 1 | 1 | 1 | 1 | 0        |
| Forastiere et al <sup>29</sup> | 2008 | 0† | 1 | 0 | 0 | 1   | 0 | n/a | 1 | 0 | 1 | 1 | 1 | <b>1</b> |
| Yang et al <sup>30</sup>       | 2008 | 1  | 1 | 1 | 1 | 0   | 1 | 0   | 1 | 0 | 0 | 1 | 1 | 0        |
| Bell et al <sup>31</sup>       | 2009 | 1  | 1 | 1 | 0 | n/a | 1 | 0   | 1 | 1 | 1 | 1 | 1 | 0        |
| Stieb et al <sup>32</sup>      | 2009 | 0§ | 1 | 1 | 1 | n/a | 1 | 0   | 0 | 1 | 1 | 1 | 1 | 0        |
| Zanobetti et al <sup>33</sup>  | 2009 | 1  | 1 | 1 | 0 | n/a | 0 | 0   | 1 | 1 | 1 | 1 | 1 | 0        |
| Colais et al <sup>34</sup>     | 2009 | 1  | 1 | 1 | 1 | 1   | 1 | 0   | 1 | 1 | 1 | 1 | 1 | <b>1</b> |
| Haley et al <sup>35</sup>      | 2009 | 1  | 1 | 1 | 1 | 1   | 1 | 1   | 1 | 1 | 1 | 1 | 1 | 0        |
| Ueda et al <sup>36</sup>       | 2009 | 1  | 1 | 1 | 1 | n/a | 1 | n/a | 1 | 1 | 1 | 1 | 1 | 0        |
| Belleudi et al <sup>37</sup>   | 2010 | 1  | 1 | 1 | 1 | 1   | 1 | 1   | 1 | 1 | 1 | 1 | 1 | <b>1</b> |

**Abbreviations** - N/A = not applicable, 1 = yes, 0 = no

† Forastiere et al only investigated pollutant associated mortality in patients already diagnosed with heart failure.

‡ Studies using Medicare data only included persons ≥ 65 years of age.

§ Refers to emergency department visits rather than hospital admissions per se.

\*\* Time stratified case crossover study defined as one controlling for time varying factors. In most case-crossover studies this consisted of day of the week. Multiple lags defined as studies evaluated pollutant levels in a distributed lag model beyond lag of 1 day. Complete evaluation of study area defined as a study where the unit of analysis for the exposure matched that of the outcome. Non-linear adjustment for temperature defined as either a quadratic, cubic or polynomial. Control for repeated events defined as those studies that have accounted for multiple hospitalisations in their analysis.

§§ Goldberg et al measured particulate matter every six days and Burnett et al estimated PM<sub>2.5</sub> values from total suspended particles

## **Appendix D**

### **US state abbreviations used in figure 3**

AR=Arkansas, AZ=Arizona, CA=California, CO=Colorado, FL=Florida, IA=Iowa, IL=Illinois, KS=Kansas, KY=Kentucky, MA=Massachusetts, MD=Maryland, ME=Maine, MI=Michigan, MN=Minnesota, NC=North Carolina, NE=Nebraska, NH=New Hampshire, NJ=New Jersey, NM=New Mexico, NV=Nevada, NY=New York, OK=Oklahoma, OR=Oregon, RI=Rhode Island, SC=South Carolina, TN=Tennessee, TX=Texas, UT=Utah, VT=Vermont, WA=Washington, WI=Wisconsin, WV=West Virginia, WY=Wyoming.



Appendix E

| State                             | Annual Hospitalisations | Hospitalisations per 100,000 <sup>‡</sup> | Cost per hospitalisation, \$ <sup>**</sup> | Median daily PM <sub>2.5</sub> , µg/m <sup>3</sup> <sup>§</sup> | PM <sub>2.5</sub> reduction to 5.8 µg/m <sup>3</sup> § | PAR (%) | Annual reduction in hospitalisations <sup>‡</sup> | Savings from reduction in hospitalisations, \$ |
|-----------------------------------|-------------------------|-------------------------------------------|--------------------------------------------|-----------------------------------------------------------------|--------------------------------------------------------|---------|---------------------------------------------------|------------------------------------------------|
| Alabama <sup>†</sup>              | 10,362                  | n/a <sup>§§</sup>                         | 38,947                                     | 12.3                                                            | 6.5                                                    | 1.41    | 146                                               | 5,696,564                                      |
| Arizona*                          | 14,192                  | 298                                       | 46,540                                     | 10.2                                                            | 4.4                                                    | 0.96    | 136                                               | 6,335,475                                      |
| Arkansas*                         | 11,189                  | 508                                       | 24,934                                     | 11.7                                                            | 5.9                                                    | 1.29    | 144                                               | 3,600,489                                      |
| California*                       | 80,583                  | 288                                       | 64,293                                     | 10.0                                                            | 4.2                                                    | 0.92    | 738                                               | 47,436,529                                     |
| Colorado*                         | 7,209                   | 190                                       | 39,302                                     | 7.7                                                             | 1.9                                                    | 0.42    | 30                                                | 1,192,075                                      |
| Connecticut <sup>†</sup>          | 7,671                   | n/a <sup>§§</sup>                         | 38,947                                     | 9.2                                                             | 3.4                                                    | 0.74    | 57                                                | 2,217,698                                      |
| Delaware <sup>†</sup>             | 1,701                   | n/a <sup>§§</sup>                         | 38,947                                     | 11.2                                                            | 5.4                                                    | 1.17    | 20                                                | 772,502                                        |
| District of Columbia <sup>†</sup> | 1,141                   | n/a <sup>§§</sup>                         | 38,947                                     | 12.1                                                            | 6.3                                                    | 1.37    | 16                                                | 610,134                                        |
| Florida*                          | 70,682                  | 478                                       | 44,079                                     | 8.0                                                             | 2.2                                                    | 0.49    | 344                                               | 15,146,138                                     |
| Georgia <sup>†</sup>              | 15,451                  | n/a <sup>§§</sup>                         | 38,947                                     | 11.6                                                            | 5.825                                                  | 1.27    | 196                                               | 7,641,612                                      |
| Idaho <sup>†</sup>                | 1,634                   | n/a <sup>§§</sup>                         | 38,947                                     | 6.8                                                             | 1.025                                                  | 0.22    | 4                                                 | 142,211                                        |
| Illinois*                         | 42,045                  | 433                                       | 35,357                                     | 10.3                                                            | 4.525                                                  | 0.99    | 415                                               | 14,664,418                                     |
| Indiana <sup>†</sup>              | 1,634                   | n/a <sup>§§</sup>                         | 38,947                                     | 11.9                                                            | 6.055                                                  | 1.32    | 176                                               | 6,863,296                                      |
| Iowa*                             | 8,651                   | 373                                       | 20,872                                     | 9.1                                                             | 3.3                                                    | 0.72    | 62                                                | 1,298,975                                      |
| Kansas*                           | 7,077                   | 333                                       | 25,864                                     | 8.5                                                             | 2.735                                                  | 0.60    | 42                                                | 1,091,337                                      |
| Kentucky*                         | 18,526                  | 559                                       | 25,786                                     | 12.6                                                            | 6.76                                                   | 1.47    | 273                                               | 7,039,938                                      |
| Louisiana <sup>†</sup>            | 11,551                  | n/a <sup>§§</sup>                         | 38,947                                     | 11.2                                                            | 5.39                                                   | 1.18    | 136                                               | 5,286,206                                      |
| Maine*                            | 4,070                   | 386                                       | 19,582                                     | 8.5                                                             | 2.74                                                   | 0.60    | 24                                                | 476,057                                        |
| Maryland*                         | 18,627                  | 421                                       | 13,382                                     | 11.0                                                            | 5.22                                                   | 1.14    | 212                                               | 2,836,553                                      |
| Massachusetts*                    | 22,439                  | 438                                       | 23,764                                     | 9.4                                                             | 3.625                                                  | 0.79    | 177                                               | 4,213,932                                      |
| Michigan*                         | 34,372                  | 456                                       | 26,594                                     | 9.4                                                             | 3.58                                                   | 0.78    | 268                                               | 7,133,916                                      |
| Minnesota*                        | 10,550                  | 262                                       | 27,904                                     | 9.2                                                             | 3.42                                                   | 0.75    | 79                                                | 2,194,833                                      |
| Mississippi*                      | 21,368                  | 966                                       | 32,016                                     | 13.4                                                            | 7.565                                                  | 1.65    | 352                                               | 11,282,267                                     |
| Missouri <sup>†</sup>             | 12,879                  | n/a <sup>§§</sup>                         | 38,947                                     | 9.2                                                             | 3.39                                                   | 0.74    | 95                                                | 3,706,838                                      |

|                           |        |                   |        |      |       |      |              |                    |
|---------------------------|--------|-------------------|--------|------|-------|------|--------------|--------------------|
| Montana <sup>†</sup>      | 1,455  | n/a <sup>§§</sup> | 38,947 | 7.8  | 2.025 | 0.44 | 6            | 250,177            |
| Nebraska*                 | 4,565  | 334               | 30,500 | 8.2  | 2.37  | 0.52 | 24           | 719,359            |
| Nevada*                   | 5,778  | 284               | 57,549 | 9.9  | 4.055 | 0.88 | 51           | 2,939,427          |
| New Hampshire*            | 3,267  | 317               | 21,887 | 8.3  | 2.495 | 0.54 | 18           | 388,922            |
| New Jersey*               | 31,506 | 468               | 71,588 | 11.1 | 5.275 | 1.15 | 362          | 25,936,565         |
| New Mexico*               | 3,358  | 218               | 25,962 | 8.8  | 2.99  | 0.65 | 22           | 568,259            |
| New York*                 | 61,320 | 407               | 38,213 | 9.8  | 4.035 | 0.88 | 539          | 20,611,676         |
| North Carolina*           | 30,682 | 423               | 24,528 | 11.1 | 5.3   | 1.16 | 354          | 8,695,172          |
| North Dakota <sup>†</sup> | 1,287  | n/a <sup>§§</sup> | 38,947 | 6.3  | 0.48  | 0.10 | 1            | 52,459             |
| Ohio <sup>†</sup>         | 31,478 | n/a <sup>§§</sup> | 38,947 | 12.2 | 6.38  | 1.39 | 438          | 17,051,540         |
| Oklahoma*                 | 11,842 | 420               | 33,925 | 8.6  | 2.845 | 0.62 | 73           | 2,491,631          |
| Oregon*                   | 8,051  | 272               | 25,805 | 8.8  | 2.955 | 0.64 | 52           | 1,338,344          |
| Pennsylvania <sup>†</sup> | 35,514 | n/a <sup>§§</sup> | 38,947 | 12.2 | 6.365 | 1.39 | 493          | 19,192,219         |
| Rhode Island*             | 3,791  | 458               | 28,848 | 8.7  | 2.87  | 0.63 | 24           | 684,239            |
| South Carolina*           | 15,052 | 425               | 33,290 | 11.3 | 5.495 | 1.20 | 180          | 6,002,500          |
| South Dakota <sup>†</sup> | 1,303  | n/a <sup>§§</sup> | 38,947 | 7.5  | 1.71  | 0.37 | 5            | 189,125            |
| Tennessee*                | 22,694 | 468               | 30,256 | 12.4 | 6.61  | 1.44 | 327          | 9,894,196          |
| Texas*                    | 63,155 | 345               | 45,107 | 8.6  | 2.79  | 0.61 | 384          | 17,326,561         |
| Utah*                     | 2,836  | 150               | 34,570 | 6.6  | 0.77  | 0.17 | 5            | 164,571            |
| Vermont*                  | 1,238  | 249               | 15,691 | 8.0  | 2.225 | 0.49 | 6            | 94,223             |
| Virginia <sup>†</sup>     | 13,375 | n/a               | 38,947 | 11.0 | 5.21  | 1.14 | 152          | 5,916,376          |
| Washington*               | 13,174 | 256               | 30,625 | 9.6  | 3.82  | 0.83 | 110          | 3,359,801          |
| West Virginia*            | 7,923  | 541               | 17,850 | 12.2 | 6.375 | 1.39 | 110          | 1,965,462          |
| Wisconsin*                | 14,626 | 336               | 24,791 | 8.8  | 3.03  | 0.66 | 97           | 2,395,073          |
| Wyoming*                  | 1,006  | 235               | 20,279 | 6.6  | 0.82  | 0.18 | 2            | 36,468             |
| <b>Total</b>              |        |                   |        |      |       |      | <b>7,978</b> | <b>307,144,339</b> |

\*Data derived from the Health Care Utilization Project for 2010, except for New Hampshire for which only 2009 data was available.

† Data derived from Chronic Condition Data Warehouse (CCDW) database for 2010

‡ To calculate annual reduction in heart failure hospitalizations population data was derived from the US Census 2010

§ Daily median PM<sub>2.5</sub> levels were acquired by state from 2008 Centre of Disease Control WONDER database and reduction in PM<sub>2.5</sub> per state was calculated by using a target threshold of 5.8 µg/m<sup>3</sup> as described by Evans et al<sup>38</sup>

§§ Heart failure hospitalizations were only available for patients over the age of 65 from the CCDW database therefore we were unable to calculate hospitalisations per 100,000 for these states

\*\* Amount the hospital charged for the entire hospital stay by state excluding professional fees in dollars. Derived from the Healthcare Cost and Utilization Project (HCUP) - State Inpatient Database (SID) in the USA

Abbreviations: PAR = Population attributable risk

## References

1. Schwartz J, Morris R. Air pollution and hospital admissions for cardiovascular disease in Detroit, Michigan. *American Journal Of Epidemiology*. Jul 1 1995;142(1):23-35.
2. Morris RD, Naumova EN, Munasinghe RL. Ambient air pollution and hospitalization for congestive heart failure among elderly people in seven large US cities. *American Journal Of Public Health*. Oct 1995;85(10):1361-1365.
3. Burnett RT, Dales RE, Brook JR, Raizenne ME, Krewski D. Association between ambient carbon monoxide levels and hospitalizations for congestive heart failure in the elderly in 10 Canadian cities. *Epidemiology*. Mar 1997;8(2):162-167.
4. Poloniecki JD, Atkinson RW, de Leon AP, Anderson HR. Daily time series for cardiovascular hospital admissions and previous day's air pollution in London, UK. *Occup Environ Med*. Aug 1997;54(8):535-540.
5. Morris RD, Naumova EN. Carbon monoxide and hospital admissions for congestive heart failure: evidence of an increased effect at low temperatures. *Environ Health Perspect*. Oct 1998;106(10):649-653.
6. Wong CM, Ma S, Hedley AJ, Lam TH. Does ozone have any effect on daily hospital admissions for circulatory diseases? *Journal of epidemiology and community health*. Vol 531999:580-581.
7. Wong TW, Lau TS, Yu TS, et al. Air pollution and hospital admissions for respiratory and cardiovascular diseases in Hong Kong. *Occup Environ Med*. Oct 1999;56(10):679-683.
8. Burnett RT, Smith-Doiron M, Stieb D, Cakmak S, Brook JR. Effects of particulate and gaseous air pollution on cardiorespiratory hospitalizations. *Arch Environ Health*. Mar-Apr 1999;54(2):130-139.
9. Stieb DM, Beveridge RC, Brook JR, et al. Air pollution, aeroallergens and cardiorespiratory emergency department visits in Saint John, Canada. *J Expo Anal Environ Epidemiol*. Sep-Oct 2000;10(5):461-477.
10. Goldberg MS, Bailar JC, Burnett RT, et al. Identifying subgroups of the general population that may be susceptible to short-term increases in particulate air pollution: a time-series study in Montreal, Quebec. *Res Rep Health Eff Inst*2000:7-113; discussion 115-120.
11. Goldberg MS, Burnett RT, Valois MF, et al. Associations between ambient air pollution and daily mortality among persons with congestive heart failure. *Environ Res*. Jan 2003;91(1):8-20.
12. *Revised analyses of time-series studies of air pollution and health. Special Report*. Boston MA: Health Effects Institute;2003.
13. Linn WS, Szlachcic Y, Gong H, Jr., Kinney PL, Berhane KT. Air pollution and daily hospital admissions in metropolitan Los Angeles. *Environ Health Perspect*. May 2000;108(5):427-434.
14. Lippmann M, Ito K, Nádas A, Burnett RT. *Association of particulate matter components with daily mortality and morbidity in urban populations* Aug 2001 2000.
15. Ye F, Piver WT, Ando M, Portier CJ. Effects of temperature and air pollutants on cardiovascular and respiratory diseases for males and females older than 65 years of age in Tokyo, July and August 1980-1995. *Environ Health Perspect*. Apr 2001;109(4):355-359.
16. Kwon HJ, Cho SH, Nyberg F, Pershagen G. Effects of ambient air pollution on daily mortality in a cohort of patients with congestive heart failure. *Epidemiology*. Jul 2001;12(4):413-419.
17. Hoek G, Brunekreef B, Fischer P, van Wijnen J. The association between air pollution and heart failure, arrhythmia, embolism, thrombosis, and other cardiovascular causes of death in a time series study. *Epidemiology*. May 2001;12(3):355-357.
18. McGowan JA, Hider RN, Chacko E, Town GI. Particulate air pollution and hospital admissions in Christchurch, New Zealand. *Aust N Z J Public Health*. Feb 2002;26(1):23-29.
19. Koken PJ, Piver WT, Ye F, Elixhauser A, Olsen LM, Portier CJ. Temperature, air pollution, and hospitalization for cardiovascular diseases among elderly people in Denver. *Environ Health Perspect*. Aug 2003;111(10):1312-1317.
20. Bateson TF, Schwartz J. Who is sensitive to the effects of particulate air pollution on mortality? A case-crossover analysis of effect modifiers. *Epidemiology*. Mar 2004;15(2):143-149.
21. Metzger KB, Tolbert PE, Klein M, et al. Ambient air pollution and cardiovascular emergency department visits. *Epidemiology*. Jan 2004;15(1):46-56.
22. Wellenius GA, Bateson TF, Mittleman MA, Schwartz J. Particulate air pollution and the rate of hospitalization for congestive heart failure among medicare beneficiaries in Pittsburgh, Pennsylvania. *American Journal Of Epidemiology*. Jun 1 2005;161(11):1030-1036.

23. Wellenius GA, Schwartz J, Mittleman MA. Particulate air pollution and hospital admissions for congestive heart failure in seven United States cities. *Am J Cardiol*. Feb 1 2006;97(3):404-408.
24. Martins LC, Pereira LA, Lin CA, et al. The effects of air pollution on cardiovascular diseases: lag structures. *Rev Saude Publica*. Aug 2006;40(4):677-683.
25. Dominici F, Peng RD, Bell ML, et al. Fine particulate air pollution and hospital admission for cardiovascular and respiratory diseases. *JAMA : the journal of the American Medical Association*. Vol 2952006:1127-1134.
26. Barnett AG, Williams GM, Schwartz J, et al. The effects of air pollution on hospitalizations for cardiovascular disease in elderly people in Australian and New Zealand cities. *Environ Health Perspect*. Jul 2006;114(7):1018-1023.
27. Lee IM, Tsai SS, Ho CK, Chiu HF, Yang CY. Air pollution and hospital admissions for congestive heart failure in a tropical city: Kaohsiung, Taiwan. *Inhal Toxicol*. Aug 2007;19(10):899-904.
28. Peel JL, Metzger KB, Klein M, Flanders WD, Mulholland JA, Tolbert PE. Ambient air pollution and cardiovascular emergency department visits in potentially sensitive groups. *American Journal Of Epidemiology*. Mar 15 2007;165(6):625-633.
29. Forastiere F, Stafoggia M, Berti G, et al. Particulate matter and daily mortality: a case-crossover analysis of individual effect modifiers. *Epidemiology*. Jul 2008;19(4):571-580.
30. Yang CY. Air pollution and hospital admissions for congestive heart failure in a subtropical city: Taipei, Taiwan. *J Toxicol Environ Health A*. 2008;71(16):1085-1090.
31. Bell ML, Peng RD, Dominici F, Samet JM. Emergency hospital admissions for cardiovascular diseases and ambient levels of carbon monoxide: results for 126 United States urban counties, 1999-2005. *Circulation*. Sep 15 2009;120(11):949-955.
32. Stieb DM, Szyszkowicz M, Rowe BH, Leech JA. Air pollution and emergency department visits for cardiac and respiratory conditions: a multi-city time-series analysis. *Environ Health*. 2009;8:25.
33. Zanobetti A, Franklin M, Koutrakis P, Schwartz J. Fine particulate air pollution and its components in association with cause-specific emergency admissions. *Environ Health*. 2009;8:58.
34. Colais P, Serinelli M, Faustini A, et al. [Air pollution and urgent hospital admissions in nine Italian cities. Results of the EpiAir Project]. *Epidemiol Prev*. Nov-Dec 2009;33(6 Suppl 1):77-94.
35. Haley VB, Talbot TO, Felton HD. Surveillance of the short-term impact of fine particle air pollution on cardiovascular disease hospitalizations in New York State. *Environ Health*. 2009;8:42.
36. Ueda K, Nitta H, Ono M. Effects of fine particulate matter on daily mortality for specific heart diseases in Japan. *Circ J*. Jul 2009;73(7):1248-1254.
37. Belleudi V, Faustini A, Stafoggia M, et al. Impact of fine and ultrafine particles on emergency hospital admissions for cardiac and respiratory diseases. *Epidemiology*. May 2010;21(3):414-423.
38. Evans J, van Donkelaar A, Martin RV, et al. Estimates of global mortality attributable to particulate air pollution using satellite imagery. *Environ Res*. Jan 2013;120:33-42.
